# Supplementary material
Source: Royal Society of Chemistry journal article supplement (doi:10.1039/d5gc06006k)
Supplement: d5gc06006k1.pdf [file d5gc06006k1.pdf]

## Supporting Information

# Reclaiming Carbon Fibres: A Green Catalytic Route to Low-Temperature CFRP Recycling

Yunzi Xin,<sup>a</sup> Mai Goto,<sup>b</sup> and Takashi Shirai<sup>ab\*</sup>

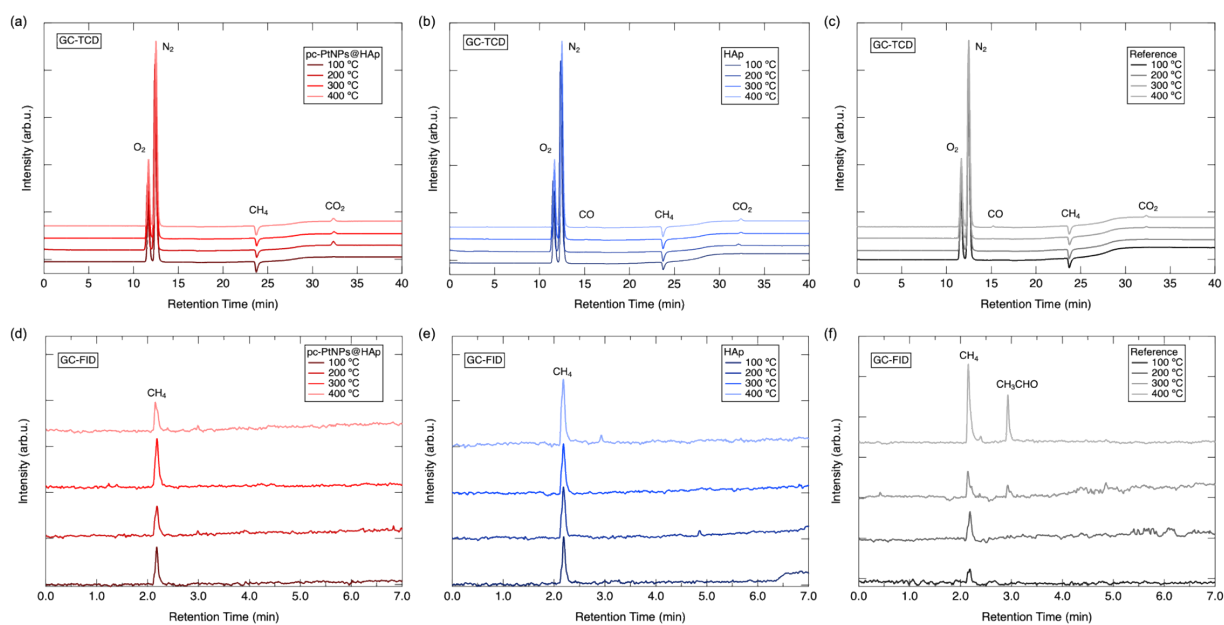

Fig. S1 (a-c) GC-TCD and (e-f) GC-FID analysis results of gas samples collected from the second stage thermal decomposition on altered catalysts under different temperatures.

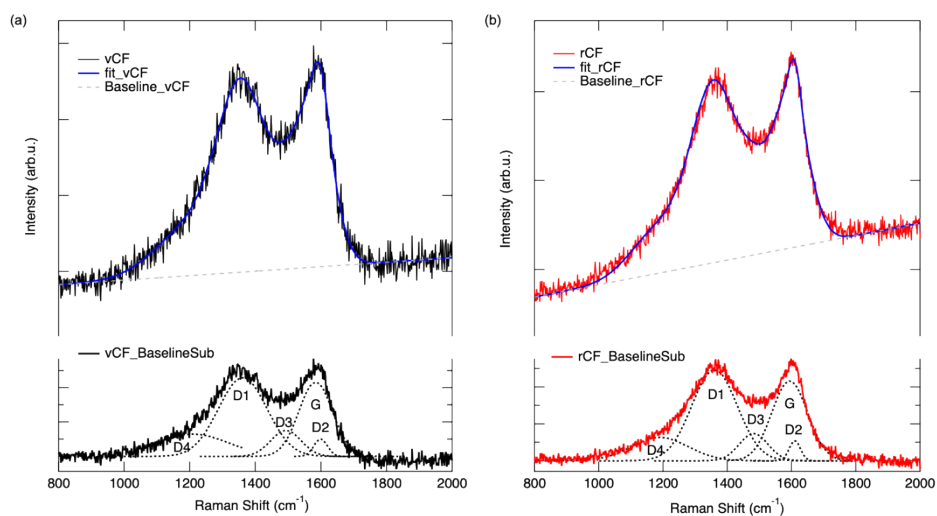

Fig. S2 Raman spectra, detailed peak fitting and deconvolution results of (a) vCF and (b) rCF recycled from pc-PtNPs@HAp carried out catalytic thermal decomposition of polymer matrix in CFRP.

Table. S1 Peak deconvolution results from fitting analysis of Raman spectra.

| Raman Peak Info. | G              |        |        | D1             |        |        | D2     |        | D3    |        | D4    |        | $I_{D1}/I_G$ |
|------------------|----------------|--------|--------|----------------|--------|--------|--------|--------|-------|--------|-------|--------|--------------|
|                  | Area           | Int.   | FWHM   | Area           | Int.   | FWHM   | Area   | Int.   | Area  | Int.   | Area  | Int.   |              |
| vCF              | 55596          | 429.09 | 121.72 | 84342          | 454.37 | 174.38 | 5258.1 | 101.24 | 84342 | 454.37 | 36413 | 131    | 1.06         |
| rCF              | 1.2006<br>e+05 | 861.27 | 130.96 | 1.745<br>7e+05 | 980.96 | 167.18 | 9472.9 | 215.05 | 33040 | 294.65 | 55779 | 251.77 | 1.14         |
